# Supplementary material
Source: Springer Nature journal article supplement (https://www.springermedizin.de/resource/supplementary/12969_2010_408_MOESM1_ESM.pdf/9593048)

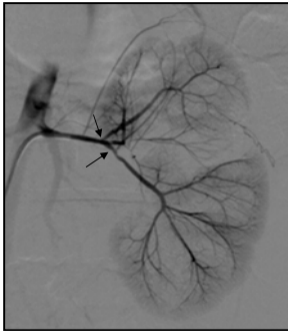

a

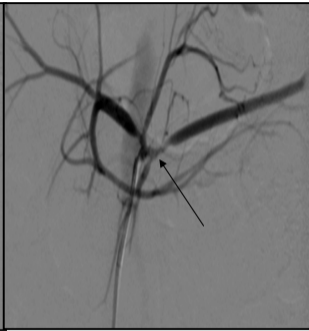

b

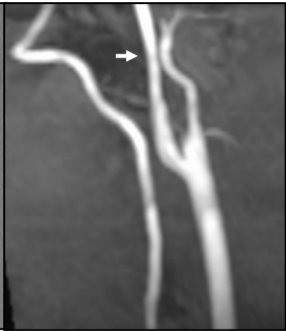

c

Supplement: MOESM1 [file 9593048]
